# Supplementary material for: Intestinal Barrier Function and Performance of Broiler Chickens Fed Additional Arginine, Combination of Arginine and Glutamine or an Amino Acid-Based Solution
Source: MDPI journal article supplement (doi:10.3390/ani11082416), 2021-08-17
Supplement: s1 [file s1]

**Table S1.** Analyzed total amino acid content of grower and finisher experimental diets (g/kg) <sup>1</sup>.

|               | <b>G1</b> | <b>G2</b> | <b>G3</b> | <b>G4</b> | <b>F1</b> | <b>F2</b> | <b>F3</b> | <b>F4</b> |
|---------------|-----------|-----------|-----------|-----------|-----------|-----------|-----------|-----------|
| His           | 4.9       | 4.8       | 4.8       | 4.8       | 4.5       | 4.4       | 4.6       | 4.6       |
| Ser           | 9.3       | 9.3       | 9.3       | 9.2       | 8.7       | 8.5       | 8.7       | 8.7       |
| Arg           | 12.8      | 17        | 15.1      | 13        | 11.8      | 15.6      | 14.1      | 12.4      |
| Gly           | 10.1      | 10        | 10.1      | 10        | 9.4       | 9.2       | 9.5       | 9.6       |
| Asp           | 17.4      | 17.1      | 17.2      | 17.1      | 15.9      | 15.4      | 16        | 15.9      |
| Glutamic acid | 39.7      | 39.4      | 41.7      | 39.4      | 38        | 37.3      | 40.4      | 38.2      |
| Thr           | 8.8       | 8.8       | 8.8       | 8.9       | 8         | 7.7       | 8         | 8.3       |
| Ala           | 8.5       | 8.4       | 8.4       | 8.5       | 8         | 7.8       | 8         | 8         |
| Pro           | 12.6      | 12.5      | 12.5      | 12.5      | 12.2      | 12.1      | 12.1      | 12.2      |
| Lys           | 12.8      | 12.5      | 12.6      | 12.3      | 11.4      | 11.1      | 12.1      | 11.5      |
| Tyr           | 4.7       | 4.6       | 4.7       | 4.6       | 4.5       | 4.1       | 4.4       | 4.5       |
| Met           | 4.7       | 5         | 5.6       | 5.5       | 4.8       | 4.6       | 4.5       | 4.7       |
| Val           | 10.6      | 10.5      | 10.5      | 10.3      | 9.1       | 8.9       | 9.2       | 9.2       |
| Ile           | 9.2       | 9.1       | 9.1       | 8.9       | 8.4       | 8.2       | 8.4       | 8.4       |
| Leu           | 15.5      | 15.4      | 15.4      | 15.4      | 14.6      | 14.3      | 14.6      | 14.6      |
| Phe           | 9.4       | 9.3       | 9.3       | 9.2       | 8.8       | 8.6       | 8.8       | 8.8       |

<sup>1</sup> Each value represents average of duplicate analysis; Grower (G); G1: control; G2: Control + Arg; G3: Control + Arg + Gln; G4: Control + MIX; Finisher diets (F); F1: control; F2: Control + Arg; F3: Control + Arg + Gln; F4: Control + MIX .
